# Supplementary material for: MetaPhOrs: orthology and paralogy predictions from multiple phylogenetic evidence using a consistency-based confidence score
Source: PubMed Central journal article supplement — Nucleic Acids Res. 2010 Dec 11;39(5):e32. doi: 10.1093/nar/gkq953 (PMC3061081; doi:10.1093/nar/gkq953), 2010-12-11
Supplement: supp_gkq953_MetaPhOrs_supplementary_table_3.pdf [file supp_gkq953_MetaPhOrs_supplementary_table_3.pdf]

**Table 3. Phylogenetic tree reconstruction test**

The number of complete orthologous groups and the mean fraction of correct split of ML trees for gene trees from three different kingdoms are shown. The higher value, the better the gene trees agree with the species tree. These results can be directly combined with Altenhoff and Dessimoz, 2009 (Fig. 3). FIS-Fraction of identical splits.

|                | Eukaryota groups |         | Fungi groups |         | Bacteria groups |         |
|----------------|------------------|---------|--------------|---------|-----------------|---------|
|                | groups           | FIS [%] | groups       | FIS [%] | groups          | FIS [%] |
| phylomeDB      | 1977             | 90.2    | 2125         | 90.6    | 207             | 49.3    |
| metaPhOrs EL=1 | 948              | 90.6    | 2195         | 89.8    | 191             | 52.9    |
| metaPhOrs EL=2 | 136              | 91.8    | 1135         | 91.4    | 95              | 51.2    |
| metaPhOrs EL=3 | 8                | 92.9    | 532          | 92.4    | 21              | 49      |
